# Supplementary material for: Young adults’ cigarillo risk perceptions, attention to warning labels and perceptions of proposed pictorial warnings: a focus group study
Source: PubMed Central journal article supplement — BMJ Open. 2022 Jun 27;12(6):e061064. doi: 10.1136/bmjopen-2022-061064 (PMC9240892; doi:10.1136/bmjopen-2022-061064), 2022-06-27
Supplement: bmjopen-2022-061064supp001.pdf [file bmjopen-2022-061064supp001.pdf]

## Supplementary File

| <b>Supplementary Table S1: FDA Cigar Labeling and Warning Statement Requirements</b>                                                                                                                                                                                                                                        |
|-----------------------------------------------------------------------------------------------------------------------------------------------------------------------------------------------------------------------------------------------------------------------------------------------------------------------------|
| <b>WARNING:</b> Cigar smoking can cause cancers of the mouth and throat, even if you do not inhale.                                                                                                                                                                                                                         |
| <b>WARNING:</b> Cigar smoking can cause lung cancer and heart disease.                                                                                                                                                                                                                                                      |
| <b>WARNING:</b> Cigars are not a safe alternative to cigarettes.                                                                                                                                                                                                                                                            |
| <b>WARNING:</b> Tobacco smoke increases the risk of lung cancer and heart disease, even in nonsmokers.                                                                                                                                                                                                                      |
| <b>WARNING:</b> Cigar use while pregnant can harm you and your baby.<br>or<br><b>SURGEON GENERAL WARNING:</b> Tobacco Use Increases the Risk of Infertility, Stillbirth and Low Birth Weight.*                                                                                                                              |
| <b>WARNING:</b> This product contains nicotine. Nicotine is an addictive chemical.                                                                                                                                                                                                                                          |
| Source: <a href="https://www.fda.gov/tobacco-products/labeling-and-warning-statements-tobacco-products/cigar-labeling-and-warning-statement-requirements#statements">https://www.fda.gov/tobacco-products/labeling-and-warning-statements-tobacco-products/cigar-labeling-and-warning-statement-requirements#statements</a> |
